# Supplementary material for: Identification of the Natural Steroid Sapogenin Diosgenin as a Direct Dual-Specific RORα/γ Inverse Agonist
Source: MDPI journal article supplement (doi:10.3390/biomedicines10092076), 2022-08-25
Supplement: s1 [file s1]

## Supplementary Materials

### Identification of the natural steroid sapogenin diosgenin as a direct dual-specific ROR $\alpha$ / $\gamma$ inverse agonist

Patrik F. Schwarz, Alexander F. Perhal, Lucia N. Schöberl, Martin M. Kraus, Johannes Kirchmair, and Verena M. Dirsch

Resazurin conversion assay (HEK293 cells)  
(n=3)

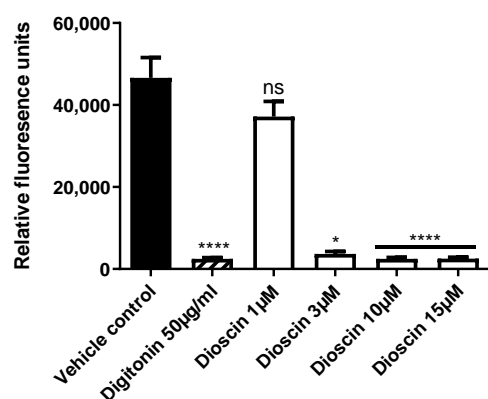

(a)

Resazurin conversion assay (HEK293 cells)  
(n=3)

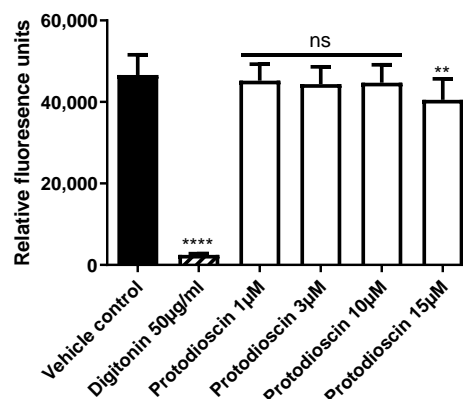

(b)

**Figure S1. Resazurin conversion assay of dioscin and protodioscin in HEK293 cells.** To exclude potential cytotoxic effects of dioscin and protodioscin in HEK293 cells, resazurin conversion assay were performed. Cells were treated with digitonin (50 µg/ml) as a positive control or dioscin/protodioscin at the indicated concentrations for 18 hours. After addition of resazurin (10 µg/ml) cells were incubated for another 5 hours before RFU values were measured at  $\lambda_{em} = 590$  nm. Data are presented as means  $\pm$  SD of three biological replicates (n=3) measured in technical quadruplicates. Kruskal-Wallis test followed by Dunn's post hoc test (a) or one-way ANOVA followed by Dunnett's post hoc test (b) were used for statistical analysis. \*\*\*\*p $\leq$ 0.0001, \*\*p $\leq$ 0.01, \*p $\leq$ 0.05, ns p $>$ 0.05 as compared to vehicle control.

## Nuclear receptor-Gal4 assays (n=2-3)

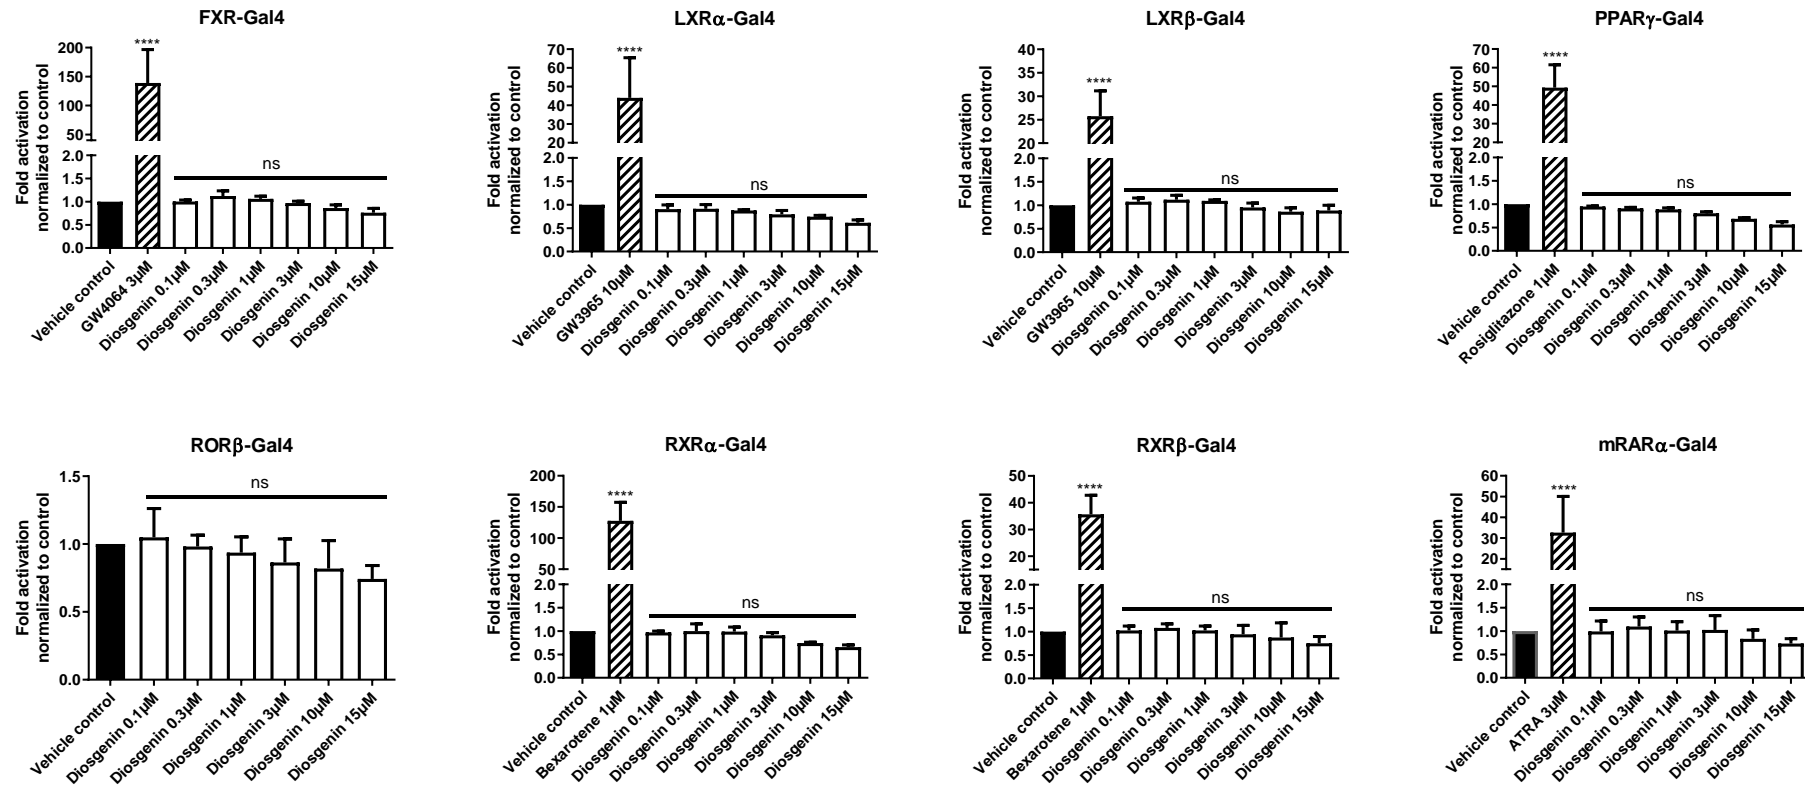

**Figure S2. Nuclear receptor-Gal4 luciferase assays of diosgenin in HEK293 cells.** Diosgenin was tested at different concentrations in cell-based nuclear receptor-Gal4 luciferase assays to determine its selectivity for ROR $\gamma$  and ROR $\alpha$ . The luminescence signals derived from the luciferase reporter were normalized to eGFP fluorescence and expressed as fold activation normalized to the vehicle control (0.096% EtOH). Published agonists of the respective nuclear receptors were used as positive controls (except ROR $\beta$ -Gal4, where a suitable positive control was not available). Bar charts represent transactivation activities expressed as mean  $\pm$  SD of three biological replicates (n=3; except for GW3965 at LXR $\alpha$ -Gal4, n=2) measured in technical quadruplicates. One-way ANOVA followed by Dunnett's post hoc test were used for statistical analysis. \*\*\*\* p $\leq$ 0.0001, ns p>0.05 as compared to vehicle control.

**Resazurin conversion assay (Jurkat T cells)**  
(n=3)

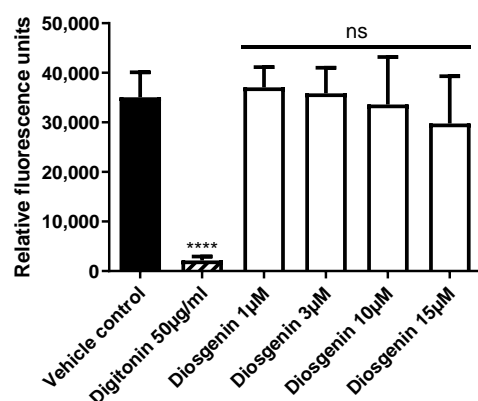

(a)

**Resazurin conversion assay (HepG2 cells)**  
(n=3)

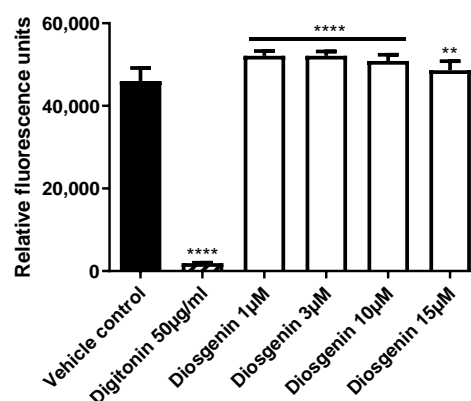

(b)

**Figure S3. Resazurin conversion assay of diosgenin in Jurkat T and HepG2 cells.** To exclude potential cytotoxic effects of diosgenin in Jurkat T (a) and HepG2 cells (b), a resazurin conversion assay was performed. Cells were treated with digitonin (50 µg/ml) as a positive control or diosgenin at the indicated concentrations for 18 hours. After addition of resazurin (10 µg/ml) cells were incubated for another 5 hours before RFU values were measured at  $\lambda_{em} = 590$  nm. In HepG2 cells, diosgenin led to a slight but significant increase in fluorescence values. Data are presented as means  $\pm$  SD of three biological replicates (n=3) measured in technical quadruplicates. one-way ANOVA followed by Dunnett's post hoc test was used for statistical analysis. \*\*\*\*p $\leq$ 0.0001, \*\*p $\leq$ 0.01, ns p>0.05 as compared to vehicle control.

**Table S1. Donated plasmids and providers.**

| <b>Plasmid</b>                                           | <b>Provider</b>                                                                                                            |
|----------------------------------------------------------|----------------------------------------------------------------------------------------------------------------------------|
| FXR-Gal4                                                 | Prof. Daniel Merk (Department of Pharmacy, Ludwig Maximilians University Munich, Munich, Bavaria, Germany)                 |
| LXR $\alpha$ / $\beta$ -Gal4                             | Prof. Makoto Makishima (Nihon University School of Medicine, Tokyo, Kantō, Japan)                                          |
| mRAR $\alpha$ -Gal4, RXR $\beta$ -Gal4                   | Prof. Hinrich Gronemeyer (IGBMC: Institut de génétique, biologie moléculaire et cellulaire, Strasbourg, Grand Est, France) |
| PPAR $\gamma$ -Gal4, RXR $\alpha$ -Gal4, tk(MH1000)4xLuc | Prof. Ronald Evans (Salk Institute for Biological Studies, La Jolla, California, USA)                                      |
| ROR $\alpha$ -Gal4, ROR $\gamma$ V1, RORE-Luc            | Prof. Patrick Griffin (UF Scripps Biomedical Research, University of Florida, Jupiter, Florida, USA)                       |
| ROR $\beta$ -Gal4                                        | Prof. Laura A. Solt (UF Scripps Biomedical Research, University of Florida, Jupiter, Florida, USA)                         |
| ROR $\gamma$ -Gal4                                       | Dr. Fabio R. Santori (Center for Molecular Medicine, University of Georgia, Athens, Georgia, USA)                          |

**Table S2. Catalog numbers and providers of commercially obtained materials.**

| <b>Material</b>                                       | <b>Catalog number</b>       | <b>Provider</b>          |
|-------------------------------------------------------|-----------------------------|--------------------------|
| <i>5X reporter lysis buffer</i>                       | E3971                       | Promega                  |
| <i>ATRA</i>                                           | R2625                       | Sigma-Aldrich            |
| <i>beta actin primer</i>                              | 249900                      | Qiagen                   |
| <i>Bexarotene</i>                                     | SML0282                     | Sigma-Aldrich            |
| <i>Cell activation cocktail (without Brefeldin A)</i> | 423302                      | BioLegend                |
| <i>Digitonin</i>                                      | D141                        | Sigma-Aldrich            |
| <i>Dioscin</i>                                        | Cay11834                    | Biomol                   |
| <i>Diosgenin</i>                                      | D1634                       | Sigma-Aldrich            |
| <i>DMEM</i>                                           | 12-917F                     | Lonza                    |
| <i>EDTA</i>                                           | 8043.2                      | Carl Roth                |
| <i>EMEM</i>                                           | 12-125F                     | Lonza                    |
| <i>EtOH 96%</i>                                       | 9065                        | Carl Roth                |
| <i>FBS</i>                                            | S1810 (batch number: S00CN) | biowest                  |
| <i>G6PC primer</i>                                    | /                           | Microsynth               |
| <i>GAPDH primer</i>                                   | 249900                      | Qiagen                   |
| <i>GoTaq Green Master Mix</i>                         | M712                        | Promega                  |
| <i>GW3965</i>                                         | G6295                       | Sigma-Aldrich            |
| <i>GW4064</i>                                         | G5172                       | Sigma-Aldrich            |
| <i>HEK293 cells</i>                                   | CRL-1573                    | ATCC                     |
| <i>HepG2 cells</i>                                    | HB-8065                     | ATCC                     |
| <i>High-capacity cDNA Reverse Transcription Kit</i>   | 4368814                     | Thermo Fisher Scientific |
| <i>IL-17 primer</i>                                   | /                           | Microsynth               |
| <i>innuPREP RNA Mini Kit 2.0</i>                      | 845-KS-2040250              | Analytik Jena            |
| <i>L-glutamine</i>                                    | BE17-605E                   | Lonza                    |
| <i>Lipofectamine 3000</i>                             | L3000001                    | Thermo Fisher Scientific |
| <i>Lipofectamine LTX with PLUS Reagent</i>            | A12621                      | Thermo Fisher Scientific |
| <i>pEGFP-N1</i>                                       | 6085-1                      | Clontech                 |
| <i>Penicillin-Streptomycin mixture</i>                | DE17-602E                   | Lonza                    |
| <i>Protodioscin</i>                                   | Cay11887                    | Biomol                   |
| <i>Resazurin sodium salt</i>                          | 199303                      | Sigma-Aldrich            |
| <i>Rosiglitazone</i>                                  | R2408                       | Sigma-Aldrich            |
| <i>RPMI-1640</i>                                      | 12-167F                     | Lonza                    |
| <i>SR2211</i>                                         | SML1170                     | Sigma-Aldrich            |
| <i>T0901317</i>                                       | T2320                       | Sigma-Aldrich            |
| <i>Trypsin</i>                                        | 27250-018                   | Thermo Fisher Scientific |
